# Supplementary material
Source: publisher figshare collection journal article supplement (https://frontiersin.figshare.com/ndownloader/files/17795447)

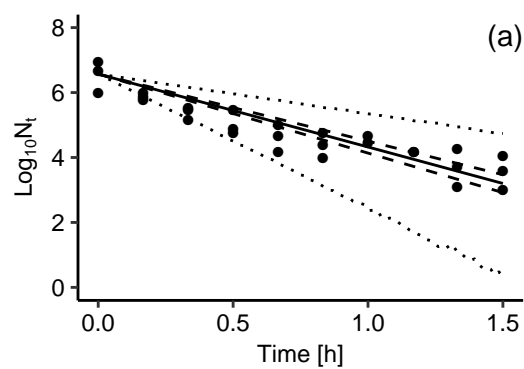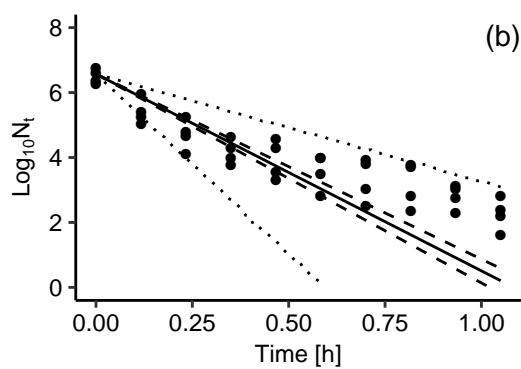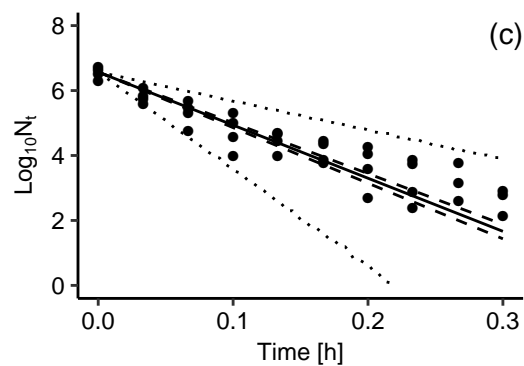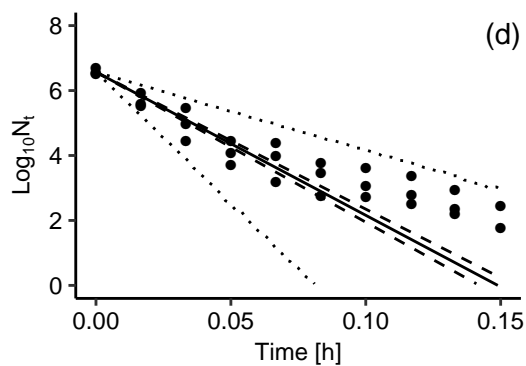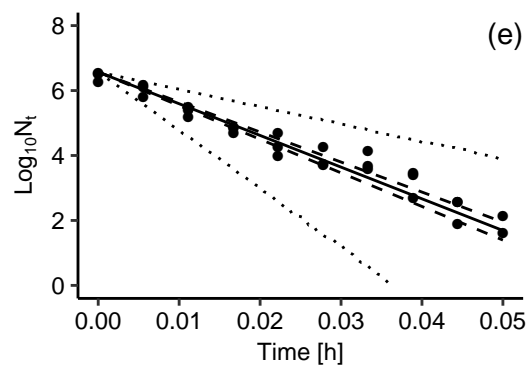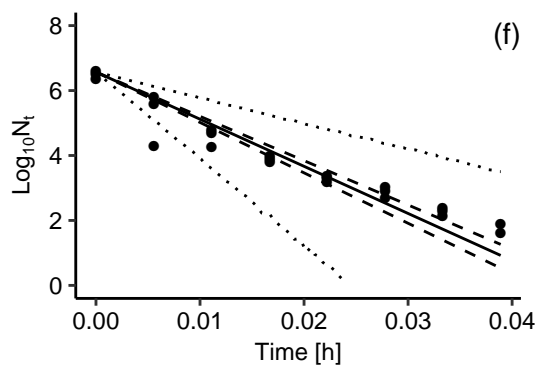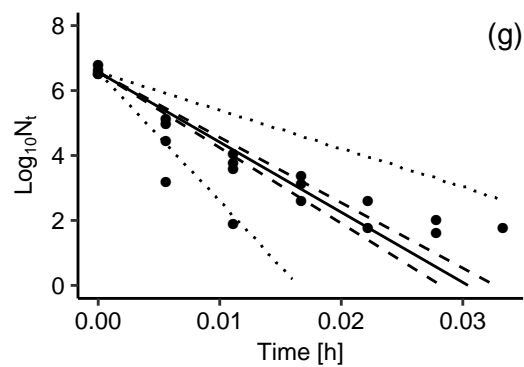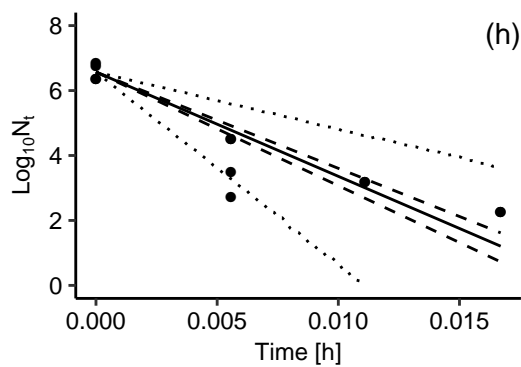

Supplement: Supplementary file 3 [file 17795447]

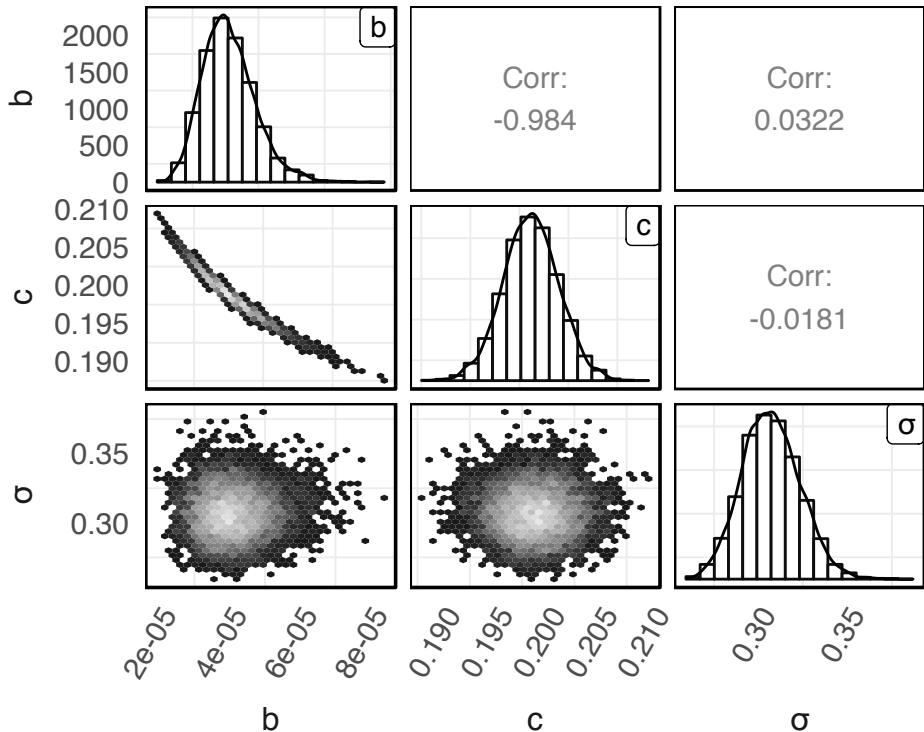

Supplement: Supplementary file 6 [file 17795447]

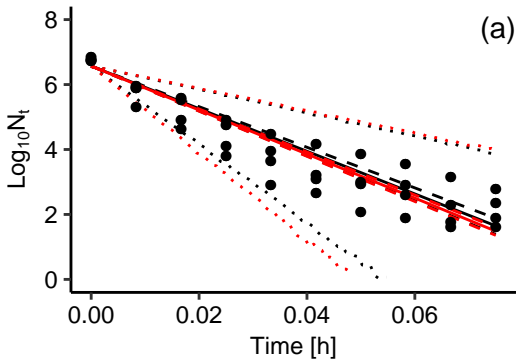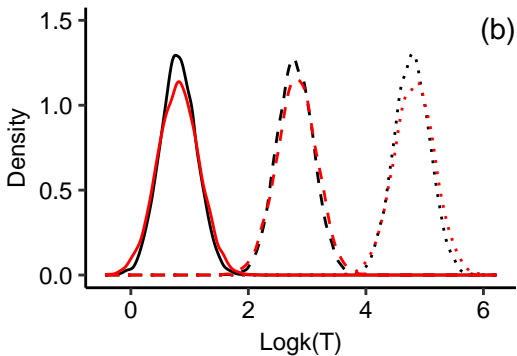

Supplement: Supplementary file 7 [file 17795447]

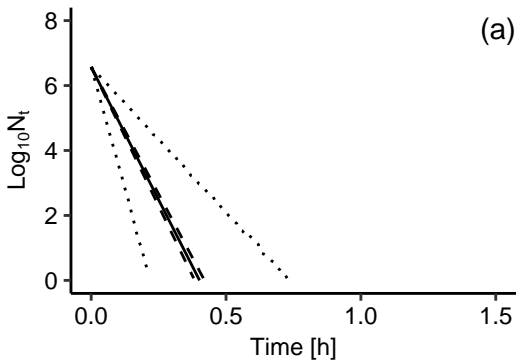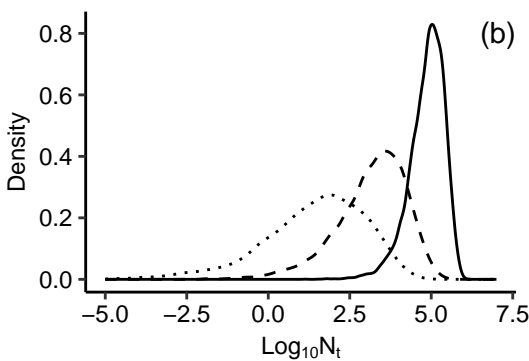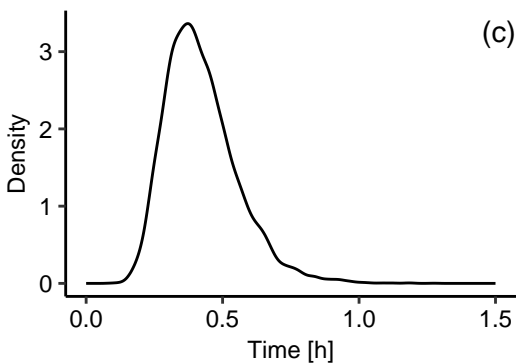

Supplement: Supplementary file 9 [file 17795447]

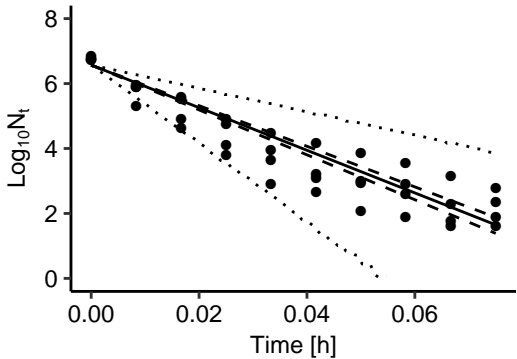

Supplement: Supplementary file 10 [file 17795447]
